1 **Nutrient sensing in the nucleus of the solitary tract mediates non-aversive suppression of feeding via**  
2 **inhibition of AgRP neurons.**

3

4 Anthony H. Tsang, Danae Nuzacci, Tamana Darwish, Havish Samudrala, Clémence Blouet\*

5 Metabolic Research Laboratories, Wellcome Trust MRC Institute of Metabolic Science, Addenbrooke's  
6 Hospital, Hills Road, Cambridge CB2 0QQ, UK

7

8 \*Corresponding author: Dr Clemence Blouet, [csb69@medschl.cam.ac.uk](mailto:csb69@medschl.cam.ac.uk)

9

10 **Summary**

11 The nucleus of the solitary tract (NTS) is emerging as a major site of action for the appetite-suppressive  
12 effects of leading pharmacotherapies currently investigated for the treatment of obesity. However, our  
13 understanding of how NTS neurons regulate appetite remains incomplete. Here we used NTS nutrient  
14 sensing as an entry point to characterize stimulus-defined neuronal ensembles engaged by the NTS to  
15 produce physiological satiety. Using activity-dependent expression of genetically-encoded circuit  
16 analysis tools, we found that NTS detection of leucine engages NTS prolactin-releasing peptide (PrRP)  
17 neurons to inhibit AgRP neurons via a population of leptin-receptor-expressing neurons in the  
18 dorsomedial hypothalamus. This circuit is necessary for the anorectic response to NTS leucine, the  
19 appetite-suppressive effect of high protein diets, and the long-term control of energy balance. These  
20 results extends the integrative capability of AgRP neurons to include brainstem nutrient sensing inputs.

21

22 **Keywords:** nucleus of the solitary tract, appetite, obesity, AgRP neurons, hypothalamus, PrRP neurons,  
23 metabolic diseases, circuit mapping

24

## 25 Introduction

26 The nucleus of the solitary tract (NTS) is established as a major brain site for the sensing and  
27 integration of signals relevant to the control of feeding behavior. It is a neuroanatomical hub for  
28 ascending vagal afferents activated by ingested foods, corticolimbic-descending inputs encoding  
29 homeostatic, cognitive and motivational controls of feeding, and blood-borne signals diffusing from the  
30 adjacent area postrema (AP) that lacks a blood-brain barrier (Grill & Hayes, 2009). Molecularly, it is  
31 enriched in specialized interoceptive neuronal populations equipped to monitor circulating levels of  
32 nutrients, gut hormones and adiposity signals (Blouet & Schwartz, 2012).

33 NTS processing of these diverse inputs is classically described as the main mediator of the short-  
34 term negative feedback control of ingestion (or satiation) via recruitment of medullary motor output  
35 circuits (Grill & Hayes, 2009). The NTS also relays processed information to the lateral parabrachial  
36 nucleus (IPBN), established as a common target for NTS efferents in the central representation of  
37 aversive and avoidance feeding-related cues (D.-Y. Kim et al., 2020; Palmiter, 2018). In both cases, the  
38 NTS outputs interrupts food ingestion, and until recently had not been implicated in the regulation of  
39 hunger, the long-term control of satiety, or hedonic feeding. Studies applying molecular genetics or  
40 modern circuit analysis tools to the functional characterization of NTS neurons revealed that the NTS  
41 can in fact modulate a much bigger range of behavioral effectors of energy balance including meal  
42 initiation and satiety (Blouet & Schwartz, 2012; D'Agostino et al., 2016; Gaykema et al., 2017; Hayes et  
43 al., 2011; Su et al., 2017). Yet, little is known about the neural mechanisms through which the NTS  
44 regulates forebrain hunger and satiety circuits, and the physiological contexts in which these NTS  
45 feeding-regulatory forebrain-projecting outputs are engaged.

46 Conceptually, a key question is whether different behavioral effectors of ingestion (i.e. satiation,  
47 avoidance/aversion, satiety, food-seeking) are engaged by distinct and functionally specialized NTS  
48 neuronal subsets. Evidence that segregated subsets of CCK<sup>NTS</sup> or TH<sup>NTS</sup> neurons project to the IPBN or  
49 hypothalamus to produce either avoidance/aversive anorexia vs. satiety or glucoprivic feeding support  
50 this view (Aklan et al., 2020; Roman et al., 2017). Alternatively, or in addition to this possibility,  
51 recruitment of the same neurons could simultaneously or gradually evoke multiple of these behavioral  
52 outputs. The fact that NTS catecholaminergic neurons send collaterals to midbrain and forebrain targets  
53 provides a neuroanatomical basis for the latter (Petrov et al., 1993), which could explain the ability of  
54 high doses of the satiation hormones like CCK to recruit aversive circuits (Swerdlow et al., 1983), and/or  
55 provide a mechanism for the synergistic feeding suppressive effects produced by the combination of  
56 anorectic signals (Bhavsar et al., 1998; Blevins et al., 2009; Blouet & Schwartz, 2012). Addressing this

57 question with molecularly-defined circuit analysis tools is difficult because most identified NTS  
58 neurochemical subsets are functionally heterogeneous, respond to multiple cues and project widely  
59 throughout the neuraxis (D'Agostino et al., 2016; Rinaman, 2010). Instead, it may be possible to better  
60 understand the functional organization of NTS feeding-regulatory circuits using functionally-defined  
61 circuit mapping, which could be particularly insightful if subsets of NTS neurons are specialized in the  
62 transmission of highly specific sensory cues and organized in a similar fashion as gustatory and vagal  
63 sensory neurons (Bai et al., 2019; Williams et al., 2016). Applying such a strategy to signals able to  
64 produce satiation or satiety without negative consequences may lead to important new understanding  
65 of how to pharmacologically suppress appetite without undesirable side effects.

66 We previously showed that NTS sensing of the branched-chain amino acid leucine not only  
67 modulates the control of meal size but also rapidly suppresses hunger in fasted animals and increases  
68 satiety without the production of conditioned taste aversion (Blouet & Schwartz, 2010; Cheng et al.,  
69 2020). Here, we used NTS leucine sensing as a functional entry point to investigate ascending neural  
70 circuits engaged by NTS neurons to modulate hunger and satiety. In these experiments, Leucine is  
71 injected into the NTS at physiologically relevant doses to model the postprandial increase in brain  
72 leucine levels as seen in response to the consumption of high-protein meals, a dietary paradigm that  
73 potently suppresses food intake. We employed an activity-dependent labelling and circuit mapping  
74 strategy which allowed to express circuit analysis tools specifically in leucine-sensing neurons and  
75 downstream circuits.

76 **RESULTS**

77

78 **NTS amino acid sensing inhibits AgRP neurons via a polysynaptic circuit**

79 NTS leucine sensing rapidly reduces hunger in fasted rodents (Blouet & Schwartz, 2012;  
80 Cavanaugh et al., 2015), but the underlying neural circuit mediating this response is unknown. To  
81 characterize the ascending neural circuits engaged by NTS leucine sensing to rapidly inhibit appetite, we  
82 first assessed neuronal activation throughout the neuraxis in response to local bilateral NTS leucine  
83 administration. Mice were fasted for 6h and received a site-specific injection of 50nl of leucine per side  
84 into the caudomedial NTS as previously described (Cavanaugh et al., 2015) (Fig. 1a). Neuronal activity  
85 was assessed using c-fos immunohistochemistry 80 min later. NTS leucine induced robust c-fos  
86 expression in the caudomedial NTS as well as in the adjacent area postrema (AP) (Fig. 1b, 1c). Outside  
87 this region, only a few brain sites were significantly activated by local NTS leucine administration  
88 compared to aCSF vehicle: the locus coeruleus (LC), and the paraventricular, ventromedial and  
89 dorsomedial nuclei of the hypothalamus (Fig. 1b, 1c). In contrast, NTS leucine produced a 2-fold  
90 decrease in c-fos immunolabelling in the ARH (Fig. 1b, 1c). Of note, NTS leucine did not produce  
91 neuronal activation in the parabrachial nucleus (PBN, Fig. 1b), consistent with the lack of conditioned  
92 avoidance in response to parenchymal NTS leucine administration in mice (Cheng et al., 2020).

93 The ARH contains intermingled orexigenic and anorexigenic neurons including AgRP neurons,  
94 critical for the development of food seeking behavior and meal initiation in hungry mice (Atasoy et al.,  
95 2012; Fenselau et al., 2017). We previously found that NTS leucine sensing robustly increases first-meal  
96 latency in fasted mice, hence reduces the drive to approach and consume food (Blouet & Schwartz,  
97 2012); (Cavanaugh et al., 2015). This, together with the reduced c-fos expression in the ARH following  
98 NTS leucine administration, prompted us to hypothesize that hindbrain leucine sensing may rapidly  
99 inhibit AgRP neurons. To test this, we repeated the same experiment (Fig. 1a) in *Npy-hrGFP* transgenic  
100 mice, where the hrGFP signal in the mediobasal hypothalamus selectively labels all AgRP neurons (Hahn  
101 et al., 1998). A majority of ARH NPY/AgRP neurons were activated under control conditions (Fig. 1d, 1e).  
102 As predicted, NTS leucine produced a 2-fold decrease in NPY/AgRP neuronal activation throughout the  
103 rostro-caudal extent of the ARH (Fig. 1d, 1e). Thus, NTS leucine sensing rapidly inhibits ARH NPY/AgRP  
104 neurons.

105 Previous work indicates that NTS inputs can modulate the activity of AgRP (Aklan et al., 2020;  
106 Cheng et al., 2020), but the neuroanatomical organization of these inputs and the physiological  
107 conditions in which they are engaged to modulate feeding remain unclear. To establish that AgRP

108 neurons are synaptically connected to NTS neurons we performed a series of retrograde viral tracing  
109 studies. Pseudorabies virus Bartha strain (PRV-Bartha) is a neuroanatomical tracer that is transmitted  
110 retrogradely across synapses and can be used to define polysynaptic inputs to infected neurons (Pickard  
111 et al., 2002). PRV-Introvert is a newly developed version of PRV-Bartha in which retrograde viral  
112 propagation and reporter expression are activated only after exposure to Cre recombinase with high  
113 specificity (Pomeranz et al., 2017). We used PRV Introvert in *Agrp-ires-cre* mice to serially label chains of  
114 presynaptic neurons projecting to ARH AgRP neurons. Mice were sacrificed 0, 24, 48, 72h or 96h after  
115 local ARH inoculation with PRV-Introvert, and brains were examined for HA reporter expression (Fig. 1f).  
116 As expected, we did not detect any HA immunolabelling in the brain of wild type mice injected with the  
117 virus (Suppl 1a), confirming cre-dependency. At 24 h after injection, PRV-Introvert was detectable in the  
118 ARH, indicating that cre-mediated recombination occurred locally within 24 h of PRV injection. After  
119 48h, spread of the cre-activated PRV virus was observed in multiple hypothalamic sites including the  
120 arcuate, ventromedial, dorsomedial, lateral and paraventricular nuclei (Suppl. 1b, 1c). After 72h, the  
121 medial amygdala was labelled (Suppl. 1d). After 96h, we detected PRV in several pontine, midbrain and  
122 hindbrain structures. These included the medial parabrachial nucleus (mPBN) (Suppl Fig. 1e), the  
123 ventrocaudal part of the spinal trigeminal nucleus (vcSPVC) (Suppl Fig. 1f), the rostroventrolateral  
124 medulla (RVLM) (Suppl. Fig. 1e), the AP and the NTS, both in its rostral portion and in the lateral portion  
125 of the caudomedial NTS (Fig 1g , Suppl Fig 1f-1g). Thus, ARH AgRP neurons receive inputs from multiple  
126 midbrain and hindbrain sites, including the caudomedial NTS.

127         The long survival time necessary to detect the presence of PRV in the NTS suggests that the  
128 NTS→ AgRP circuit contains more than 1 synapse. Alternatively, the long distance that the virus needs to  
129 travel to label hindbrain sites may also explain the lack of signal at 48 and 72h. To clarify this, we  
130 performed cre-dependent monosynaptic retrograde viral tracing in *Agrp-ires-cre* mice using an envelope  
131 protein (EnvA) pseudotyped glycoprotein (g)-deleted rabies virus modified to express mCherry (SADΔG-  
132 mCherry(EnvA) (Callaway & Luo, 2015; E. J. Kim et al., 2016). AgRP-cre expressing neurons were first  
133 genetically modified to co-express TVA (receptor for the avian sarcoma leucosis virus glycoprotein EnvA)  
134 and oG (optimized rabies envelope glycoprotein) via targeted unilateral injections of rAAV8-hSyn-FLEX-  
135 TVA-P2A-eGFP-2A-oG into the ARH (Suppl. Fig. 1h). AgRP neurons infected with this construct became  
136 selectively competent for transduction by SADΔG-mCherry(EnvA) and expressed eGFP. 3 weeks later,  
137 mice received a unilateral injection of SADΔG-mCherry(EnvA) in the same injection site, and were  
138 sacrificed at various survival times (up to 14 days). Brains were processed to examine mcherry  
139 expression. Two weeks after the SADΔG-mCherry(EnvA) injection, we observed dense eGFP expression

140 in the ARH (Suppl. Fig. 1i) together with dense mCherry immunolabelling in the ARH, DMH and PVH  
 141 (Suppl. Fig. 1i, 1j). 42% of AgRP neurons expressing eGFP co-expressed mCherry. We carefully examined  
 142 the NTS of 8 successfully infected animals throughout the rostro-caudal extent of the NTS but did not  
 143 detect rabies-infected cell bodies (Suppl. Fig. 1k). These data support the conclusion that the NTS does  
 144 not send monosynaptic inputs to AgRP neurons.

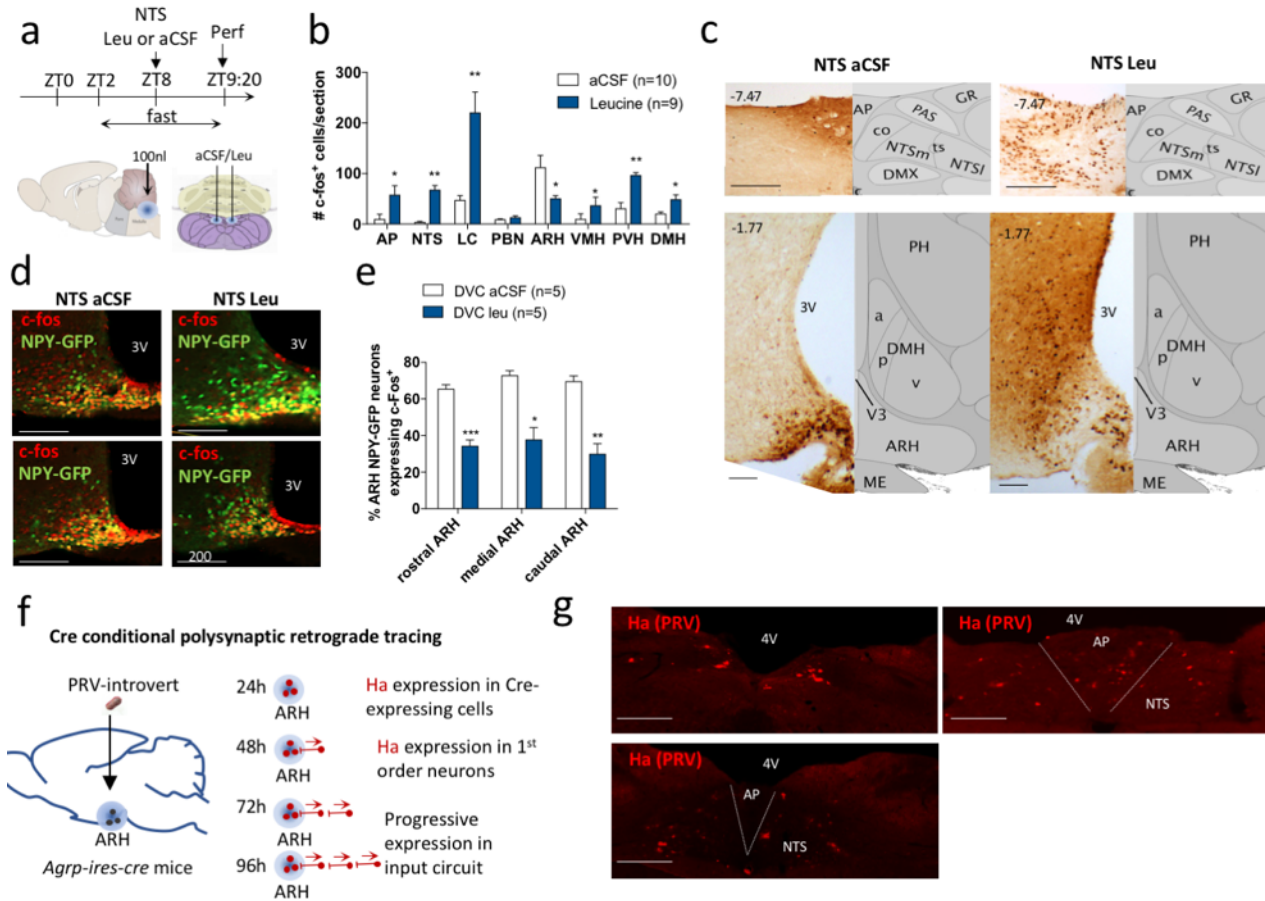

145  
 146 **Fig 1: NTS amino acid sensing inhibits AGRP neurons via a polysynaptic circuit.**  
 147 Injection paradigm (a) used to activate NTS leucine-sensing neural circuits in mice. Quantification of c-fos immunolabelling (b)  
 148 and representative images (c) from selected sites of the mouse brain following NTS leucine delivery. Representative images (d)  
 149 and quantification (e) of c-fos immunodetection in AgRP/NPY neurons in the ARH. Protocol for Cre conditional polysynaptic  
 150 retrograde tracing using PRV-Introvert (f) and expression of the PRV-Introvert reporter Ha in the caudomedial NTS after 96h (g).  
 151 Scale bar =200um. AP: area postrema, NTS: nucleus of the solitary tract, LC: locus coeruleus, PBN: parabrachial nucleus, ARH:  
 152 arcuate nucleus of the hypothalamus, VMH: ventromedial nucleus of the hypothalamus, PVH: paraventricular nucleus of the  
 153 hypothalamus, DMH: dorsomedial nucleus of the hypothalamus, 3V : 3<sup>rd</sup> ventricle, 4V: 4<sup>th</sup> ventricle. Rostral ARH: Bregma -1.07  
 154 to -1.37, Medial ARH: Bregma -1.37 to -1.77, Caudal ARH: Bregma -1/77 to -2.07. \*: p<0.05 vs. aCSF; \*\*: p<0.01 vs. aCSF; \*\*\*:  
 155 p<0.001 vs. aCSF. All results are shown as means ± SEM.

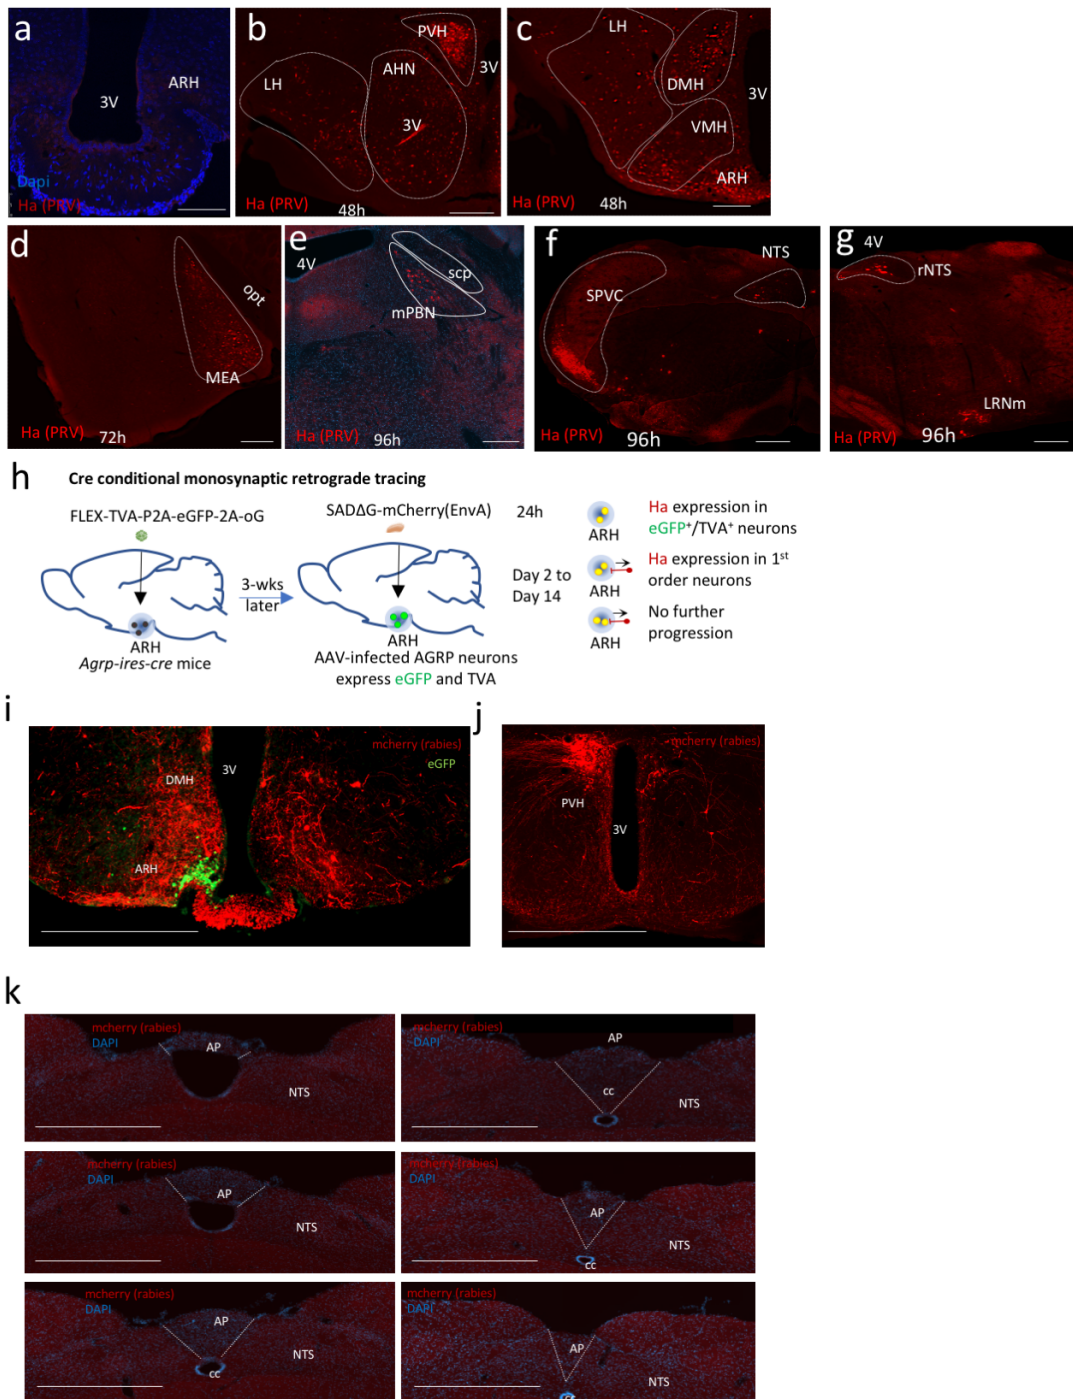

156

157

158

159

160

161

162

**Supp. Fig. 1: Cre-dependent retrograde polysynaptic and monosynaptic viral tracing in *Agrp-ires-cre* mice.** HA

immunodetection in WT mice 96h post inoculation (a) and in *Agrp-ires-cre* mice 48h (b, c) 72h (d) and 96h (e, f, g) after a

bilateral injection of PRV-Introvert in the ARH (Scale bar: 400um). Protocol for Cre conditional monosynaptic retrograde tracing

using SADΔG-mCherry(EnvA) (h) and expression of the mCherry and eGFP in the hypothalamus (i, j) and hindbrain (k) of *Agrp-*

*ires-cre* mice unilaterally infected with rAAV8-hSyn-FLEX-TVA-P2A-eGFP-2A-oG and SADΔG-mCherry(EnvA) 2-weeks after rabies

infection (Scale bar: 800um). 3V: 3rd ventricle, ARH: arcuate nucleus of the hypothalamus, PVH: paraventricular hypothalamic

163 nucleus, DMH: dorsomedial hypothalamic nucleus, LH: lateral nucleus of the hypothalamus, VMH: ventromedial hypothalamic  
164 nucleus, opt: optical tract, MEA: medial amygdala, mPBN: medial parabrachial nucleus, scp: superior cerebellar peduncles, AHN:  
165 anterior hypothalamic nucleus, NTS: nucleus of the solitary tract, AP: area postrema, cc: central canal, rNTS: rostral nucleus of  
166 the solitary tract, SPVC: Spinal nucleus of the trigeminal, LRNm: Lateral reticular nucleus, magnocellular part.

167

## 168 **NTS PrRP neurons are leucine-sensing and project to AgRP<sup>ARH</sup> neurons**

169 Previous work showed that a majority of NTS leucine-sensing neurons express TH (Blouet &  
170 Schwartz, 2012; Cavanaugh et al., 2015), but TH labels a molecularly and functionally diverse group of  
171 neurons, prompting us to further analyze the neurochemical identity of NTS neurons responsive to  
172 leucine. The NTS contains several neuronal subpopulations responsive to aversive gastrointestinal  
173 stimuli or nutritional stress, leading to the formation of visceral malaise, taste aversion or avoidance  
174 (Callaway & Luo, 2015; Holt et al., 2019; E. J. Kim et al., 2016; Patel et al., 2019; Roman et al., 2016). In  
175 contrast, some NTS neuronal subtypes are recruited preferentially in response to physiological satiation  
176 cues and do not produce aversive anorexia even in the context of pharmacological activation. These  
177 include subsets of TH<sup>NTS</sup> neurons expressing prolactin-releasing peptide (PrRP) (Kreisler et al., 2014;  
178 Lawrence et al., 2002), and recently characterized Calcr<sup>NTS</sup> neurons (Cheng et al., 2020). We previously  
179 showed that NTS leucine does not produce conditioned avoidance (Cheng et al., 2020), leading us to  
180 hypothesize that leucine specifically engages either PrRP<sup>NTS</sup> or Calcr<sup>NTS</sup> neurons to suppress feeding. To  
181 examine this possibility, we used RNAscope multiplex in situ hybridization (ISH) against *Fos*, *Prlh*  
182 (transcript for PrRP) and *Calcr* in caudomedial hindbrain sections of mice that received local NTS leucine  
183 injections as described above (Fig. 1a). We found a significant overlap between PrRP<sup>NTS</sup> and Calcr<sup>NTS</sup>  
184 neurons (Fig. 2a): 75.1±1.3% PrRP<sup>NTS</sup> neurons expressed *Calcr*, while 68.3±0.9% Calcr<sup>NTS</sup> neurons  
185 expressed *Prlh*. Most of NTS *Calcr*<sup>+</sup>/*Prlh*<sup>-</sup> neurons were concentrated in the dorsal NTS, and *Calcr* was  
186 also expressed in a dense *Prlh*<sup>-</sup> neuronal population in the AP (Fig 2a). Consistent with c-fos  
187 immunolabelling, we found that *Fos* expression rapidly increased in the NTS and AP in response to local  
188 leucine delivery (Fig. 2a-2b). Leucine activated on average 80% of PrRP<sup>NTS</sup> neurons (Fig 2a, 2c) which  
189 represented 34.7±8.6% of the total population activated by leucine in the caudomedial NTS. Analysis of  
190 high content ISH images revealed that the number of PrRP<sup>NTS</sup> neurons was similar between conditions  
191 (Fig. 2d), but leucine increased the expression of *Prlh* (Fig. 2e), introducing a role for PrRP  
192 neurotransmission in leucine-sensing neurocircuits.

193 We then determined whether PrRP<sup>NTS</sup> neurons project to ARH<sup>AgRP</sup> neurons using brain sections  
194 from *Agrp-ires-cre* mice infected with PRV-Introvert and killed 96h after infection. We found that a  
195 majority of the HA<sup>+</sup> neurons labelled 96 h after ARH PRV-Introvert delivery colocalized with TH (61±8%)



196 and PrRP (35±2%) (Fig. 2f, 2g) confirming that PrRP<sup>NTS</sup> neurons project to ARH<sup>AgRP</sup> neurons. Of note, NTS  
 197 HA<sup>+</sup> neurons did not express GDF15 receptor GFRAL (Suppl. Fig 2a), indicating that GDF15 does not  
 198 engage the NTS→AgRP<sup>ARH</sup> circuit to suppress feeding.  
 199

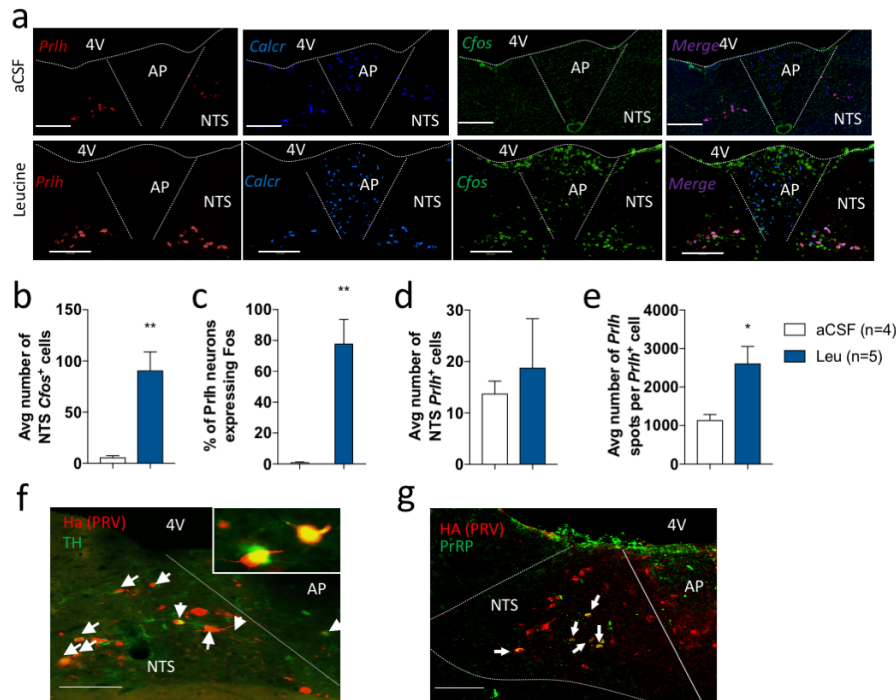

200  
 201 **Figure 2: Neurochemical characterization of NTS leucine-sensing neurons.** Representative images (a) and quantification (b-e)  
 202 of multiplexed in situ hybridization against *Prlh*, *Calcr* and *Cfos* in the dorsovagal complex of mice after an injection of leucine  
 203 into the NTS. Representative images of the colocalization of the Ha reporter from the polysynaptic retrograde virus PRV-  
 204 Introvert and tyrosine hydroxylase (TH, f) or prolactin releasing peptide (PrRP, g) by multiplexed immunofluorescent labelling in  
 205 the NTS of *AgRP-ires-cre* mice 96h after PRV-Introvert delivery into the ARH. Scale bar: 200um. 4V: 4<sup>th</sup> ventricle. AP: area  
 206 postrema, NTS: nucleus of the solitary tract. \*: p<0.05 vs. aCSF; \*\*: p<0.01 vs. aCSF; \*\*\*: p<0.001 vs. aCSF. All results are shown  
 207 as means ± SEM.

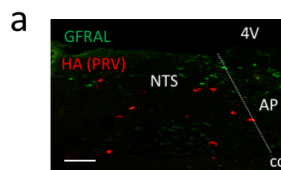

208  
 209 **Supp. Fig. 2: GFRAL and HA immunolabelling in the NTS of *AgRP-ires-cre* mice 96h after PRV-Introvert delivery into the ARH.**  
 210 Scale bar: 200um. 4V: 4<sup>th</sup> ventricle. AP: area postrema, NTS: nucleus of the solitary tract.

211

212 **NTS leucine sensing activates DMH LepR<sup>+</sup>/GPR10 neurons projecting to AgRP neurons**

213 We next investigated the neuronal populations relaying NTS leucine-sensing inputs to AgRP  
214 neurons. Given that PrRP<sup>NTS</sup> neurons represent only a third of NTS leucine-sensing neurons and a third of  
215 NTS neurons projection to AgRP<sup>ARH</sup>, and in the absence of a known specific molecular marker for NTS  
216 leucine-sensing neurons, we developed a strategy of activity-dependent circuit mapping following NTS  
217 leucine administration. We use the AAV8-Fos-ERT2-Cre-ERT2-PEST (AAV-Fos-CreERT2) virus to translate  
218 temporally delimited neuronal activity into sustained reporter expression (Ye et al., 2016). Neurons  
219 expressing AAV-Fos-CreERT2 do not express Cre unless acutely exposed to an activating stimulus  
220 together with tamoxifen. Low dose of the tamoxifen metabolite 4-hydroxytamoxifen (4-OHT) allows  
221 genetic labelling of transiently activated neurons with high temporal specificity and low background (Ye  
222 et al., 2016). *Npy-hrGFP* mice received a co-injection of AAV-Fos-CreERT2 and AAV8-EF1a-DIO-  
223 hChR2(H134R)-mCherry viruses into the caudomedial NTS. 3 weeks later, mice were exposed to 3  
224 experimental inductions, each separated by 96h (Fig. 3a). During each of these, mice were fasted for 4h  
225 during the light phase and received a bilateral NTS injection of aCSF or leucine followed 80 min later by  
226 an ip injection of 40mg/kg 4-OHT (hereafter designated as aCSF<sub>induced</sub> and Leu<sub>induced</sub> mice, respectively).  
227 Access to food was restored 4h later to avoid food-induced Cre recombination. Mice were sacrificed 14  
228 days after the last NTS injection. Using mCherry immunodetection in brain tissues, we characterized the  
229 neuroanatomical distribution of axonal projections and synaptic terminals of NTS leucine sensing  
230 neurons. mCherry expression was dense in the caudomedial NTS of mice induced with NTS leucine  
231 injections, confirming the success of the approach (Fig. 3b). We did not detect mCherry<sup>+</sup> signal in the  
232 ARH of Leu<sub>induced</sub> mice, indicating that NTS leucine-sensing neurons do not project directly to the ARH  
233 (Fig. 3c). In contrast, we found mCherry<sup>+</sup> fibers and terminals in the PVH and the ventral DMH of  
234 Leu<sub>induced</sub> mice compared to controls (Fig. 3d-e). Thus, NTS leucine-sensing neurons project to the PVH  
235 and the DMH.

236 The PVH and DMH are both good candidates to relay NTS leucine-sensing inputs from PrRP<sup>NTS</sup>  
237 neurons to AgRP neurons. Both the PVH and the DMH receive dense projections from TH<sup>NTS</sup> neurons  
238 (Suppl. Fig 3a-3c), are innervated by PrRP<sup>+</sup> fibers, and express GPR10, the receptor for PrRP (Dodd &  
239 Luckman, 2014). Previous monosynaptic retrograde tracing studies identified the PVH and the DMH as  
240 the main sources of pre-synaptic inputs to AgRP neurons (Krashes et al., 2014), and channelrhodopsin-  
241 assisted circuit mapping studies showed that all PACAP<sup>PVH</sup> and LepR<sup>DMH</sup> neurons project to and directly  
242 regulate the activity of AgRP neurons (Garfield et al., 2016; Krashes et al., 2014). However, there is  
243 limited understanding of how these neuronal inputs to AgRP neurons may be engaged under  
244 physiological conditions to modulate appetite. To examine the role of PACAP<sup>PVH</sup> and LepR<sup>DMH</sup> in relaying

245 leucine-sensing information from the NTS to AgRP neurons, we first used RNAScope to colocalize *Fos*,  
246 *Adcyap1* (transcript for PACAP) and *Prlhr* (transcript for PrRP receptor) or *Fos*, *LepR* and *Gpr10* in the  
247 PVH and DMH respectively of mice that received NTS aCSF or leucine as previously described (Fig. 1a).  
248 These experiments confirmed that NTS leucine produces a significant increase in the number of *Fos*-  
249 expressing neurons in the PVH compared to vehicle injection (Suppl. Fig. 3d) but NTS leucine did not  
250 produce an increase in the number of *Prlhr*<sup>+</sup>, *Adcyap1*<sup>+</sup> or *Prlhr*<sup>+</sup>/*Adcyap1*<sup>+</sup> PVH neurons expressing *Fos*  
251 (Suppl. Fig. 3d-3e). In the DMH, NTS leucine increased *Fos* expression in a group of neurons  
252 concentrated in the caudal DMH (fig. 3h). 30% of DMH neurons co-expressed *LepR* and *Prlhr* (Suppl. Fig.  
253 3g), and NTS leucine significantly increased the number of DMH *Prlhr*<sup>+</sup>, *LepR*<sup>+</sup> and *LepR*<sup>+</sup>/*Prlhr*<sup>+</sup> neurons  
254 expressing *Fos* (Fig. 3i-3j). Thus, NTS leucine activates neurons in the DMH that are well positioned to  
255 receive inputs from NTS PrRP neurons and project to AgRP neurons.

256 To confirm that the DMH relays NTS leucine sensing inputs to AgRP neurons, we performed  
257 activity-dependent circuit mapping from DMH neurons activated by NTS leucine. We delivered AAV-Fos-  
258 CreERT2 and AAV8-EF1a-DIO-hChr2(H134R)-mCherry viruses into the DMH of *NPY-hrGFP* mice and  
259 exposed mice to the same induction paradigm as above (fig. 3a) to label axons and synaptic terminals of  
260 DMH neurons activated by NTS leucine. In the presence of 4-OHT, NTS leucine induced a significant  
261 increase in the number of neuronal cell bodies labelled with mCherry in the DMH (Fig 4k, 4l), confirming  
262 the success of the approach to label DMH neurons responsive to NTS leucine. We observed mcherry-  
263 labelled axons in the ARH (Fig. 3m) but failed to identify additional mcherry labelling in other brain  
264 regions (not shown). These data indicate that DMH neurons activated by NTS leucine provide axo-  
265 somatic innervation of the ARH. The projection field labelled with mCherry overlapped with the hrGFP  
266 immunofluorescent labelling of NPY/AgRP neurons (Fig. 3m). Analysis of mCherry<sup>+</sup> puncta contacting  
267 ARH NPY-GFP neurons confirmed that DMH leucine-sensing neurons innervate AgRP neurons (Fig. 3n-  
268 3o). Thus, NTS leucine activates DMH neurons that project to AgRP neurons.

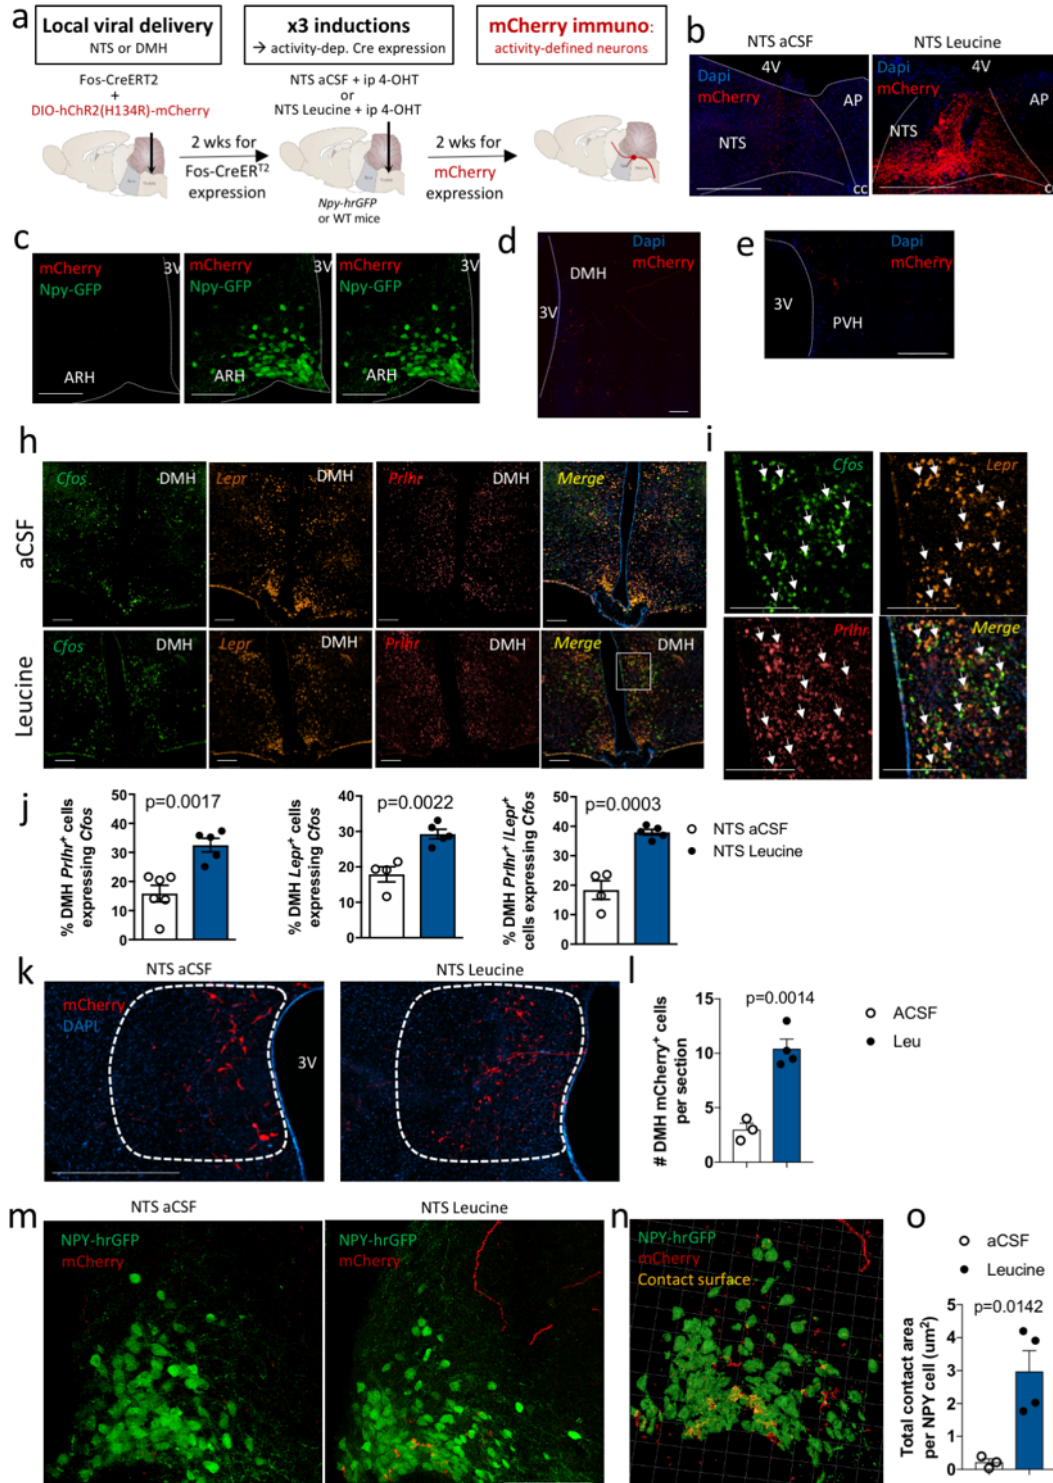

269

270

271

272

273

274

**Figure 3: NTS leucine sensing activates DMH *Lepr*<sup>+</sup>/GPR10 neurons projecting to AgRP neurons.** Diagram of experimental paradigm (a) and representative images of mCherry immunolabelling in the DVC (b), ARH (c), DMH (d) and PVH (e) for activity-dependent mapping of projection outputs of NTS leucine-sensing neurons using AAV-Fos-CreERT2 and AAV8-EF1a-DIO-hChr2(H134R)-mCherry viruses. Representative images (h), high magnification images (i) and quantifications (j) of the expression of *Fos* in *Lepr*<sup>+</sup> and *Prlhr*<sup>+</sup> neurons in the DMH of mice following an injection of aCSF or leucine in the NTS.

275 Representative images (k,m), quantification (l,o) and IMARIS 3-d reconstruction (n) of mcherry immunolabelling in the DMH (k-  
 276 l) and ARH (m-o) of *Npy-hr-GFP* mice following injection of AAV-Fos-CreERT2 and AAV8-EF1a-DIO-hChr2(H134R)-mCherry  
 277 viruses in the DMH and inductions with NTS aCSF or leucine. Scale bar is 200um. All results are shown as means  $\pm$  SEM.

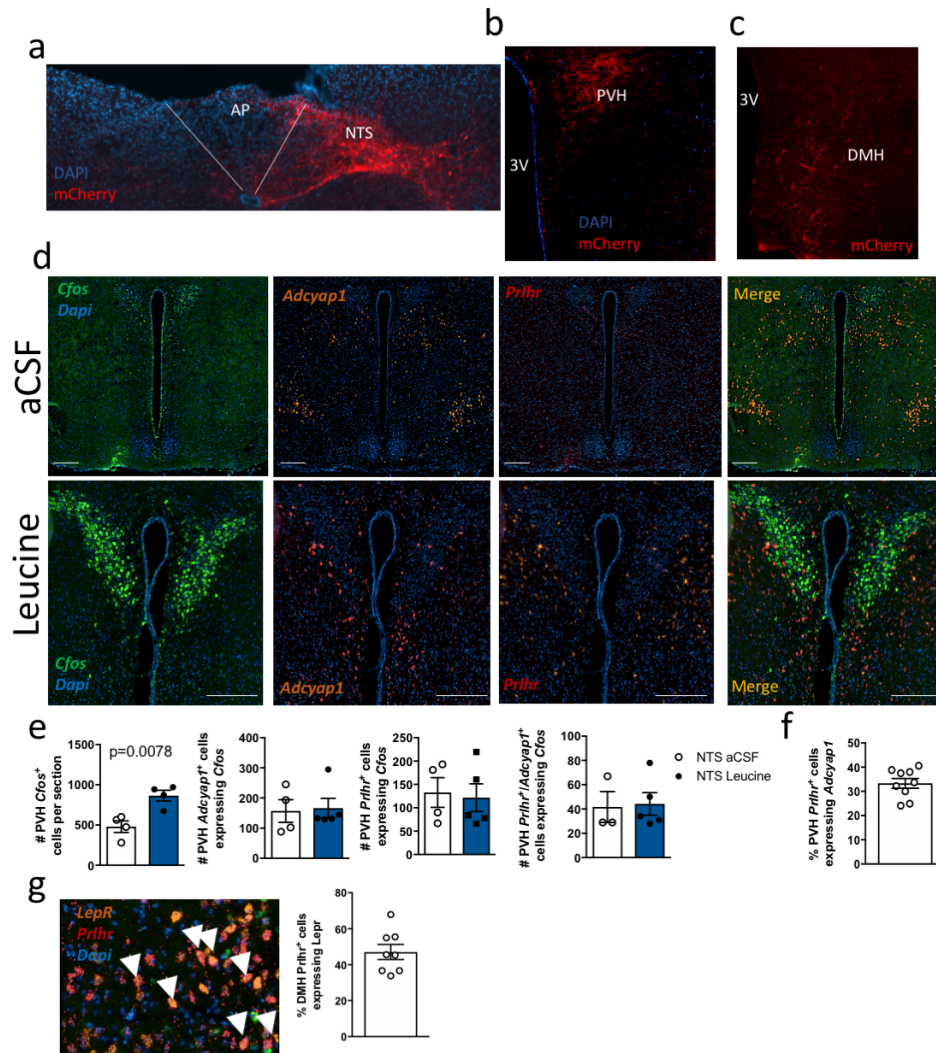

278  
 279 **Supp. Fig. 3:** Representative images on mcherry expression in the NTS (a), PVH (b) and DMH (c) in *Th-cre* mice that received a  
 280 unilateral injection of AAV8-EF1a-DIO-hChr2(H134R)-mCherry into the NTS to label synaptic terminals of NTS TH neurons.  
 281 Representative images (d) and quantification (e) of *Cfos*, *Adcyap1* and *Prhr* expression in the PVH of mice exposed to NTS aCSF  
 282 or Leucine. Quantification of *Prhr* and *Adcyap1* co-expression in the PVH (f). Representative image and quantification (g) of  
 283 *Prhr* and *LepR* co-expression in the DMH. Scale bar is 200um. All results are shown as means  $\pm$  SEM.

284  
 285 **DMH neurons responsive to NTS leucine sensing are necessary for the anorectic effect of NTS leucine**  
 286 **and high protein diets and the long-term control of energy balance.**

287 To directly test the role of DMH neurons engaged downstream from NTS leucine sensing in the  
 288 appetite-suppressing effect of NTS leucine, we selectively silenced DMH neurons activated by NTS

289 leucine using cell-specific expression of tetanus toxin (TT) to prevent synaptic neurotransmitter release.  
290 To achieve this, we co-injected AAV-Fos-CreERT2 and AAV-DJ-CMV-DIO-eGFP-2A-TeNT into the DMH of  
291 wild-type mice and exposed to the same induction paradigm as above via NTS injections of aCSF or  
292 leucine (DMH<sup>aCSF-TT</sup> and DMH<sup>leu-TT</sup>, respectively) (fig. 4a). We then compared the anorectic response to  
293 NTS leucine in DMH<sup>leu-TT</sup> and DMH<sup>aCSF-TT</sup> mice (Fig. 4b). In DMH<sup>aCSF-TT</sup> controls, NTS leucine produced the  
294 expected behavioral response, including an increase meal latency and decrease in food intake following  
295 the injection (Fig. 4c, 4d, Suppl movie 1, Suppl. Figure 4a, 4b). In contrast, NTS leucine failed to increase  
296 meal latency and decrease food intake in DMH<sup>leu-TT</sup> mice (Fig. 4c, 4d, Suppl movie 2, Suppl. Figure 4a,  
297 4b). Thus, DMH neurons engaged by NTS leucine sensing are required for the acute effects of NTS  
298 leucine on meal initiation and satiation. In addition, NTS leucine-induced reductions in 24h food intake  
299 and 24h weight change were blunted in DMH<sup>leu-TT</sup> mice (Fig. 4e, 4f), supporting a role for the NTS→DMH  
300 leucine-sensing circuit in the long-term feeding and metabolic consequences of NTS leucine sensing. Of  
301 note, over time, DMH<sup>leu-TT</sup> developed a slight but significant hyperphagia (Fig. 4g) and gained  
302 significantly more weight than the DMH<sup>aCSF-TT</sup> controls (Fig. 4h), supporting a role for DMH neurons  
303 receiving NTS leucine-sensing inputs in the chronic maintenance of energy balance.

304 Last, we asked whether this newly characterized circuit was relevant not only for the feeding-  
305 suppressive effect of NTS leucine, but also for the anorectic response to high-protein feeding. In mice,  
306 acute exposure to a high protein diet reduces appetite and weight gain (Vu et al., 2017). While the  
307 central mechanisms mediating these responses are poorly characterized, the NTS is established a  
308 neuroanatomical site responding to high protein diets (Darcel et al., 2005). Furthermore, a single high-  
309 protein meal is sufficient to increase brain leucine concentration (Darcel et al., 2005), supporting the  
310 possibility that NTS leucine -sensing neurons could mediate appetite suppression in response to dietary  
311 proteins. To address this, we exposed DMH<sup>leu-TT</sup> and DMH<sup>aCSF-TT</sup> mice to a high protein diet containing  
312 45% of energy as protein (P45) and isocaloric with the control maintenance diet containing 20% energy  
313 as protein (P20, control maintenance diet). To avoid a neophobic response to the P45 diet, mice were  
314 first briefly exposed to P45 pellets (3 times for 30-min on 3 consecutive days). A week later, mice were  
315 switched to the P45 diet for 6 days. In control DMH<sup>aCSF-TT</sup> mice, the P45 diet produced a rapid 30%  
316 decrease in energy intake, followed by a sustained 10 to 15% reduction in daily energy intake in the  
317 following days (Fig. 4i). The anorectic response to the high protein diet was associated with sustained  
318 weight loss (Fig. 4j), confirming the feeding and metabolic effects of high-protein feeding under these  
319 conditions. In contrast, the anorectic response to P45 was blunted DMH<sup>leu-TT</sup> mice (Fig. 4i) and  
320 remarkably the P45 diet did not produce a weight response in these mice (Fig. 4j). Thus, DMH neurons

321 activated by NTS leucine are required for the acute anorectic response to high protein diets, while other  
 322 pathways likely mediate the sustained anorectic effect of dietary proteins. Unexpectedly, these results  
 323 indicate that the NTS→DMH leucine-sensing circuit contributes to the metabolic effect of high-protein  
 324 diets. These results provide a central mechanism for the behavioral and metabolic effects of dietary  
 325 protein.

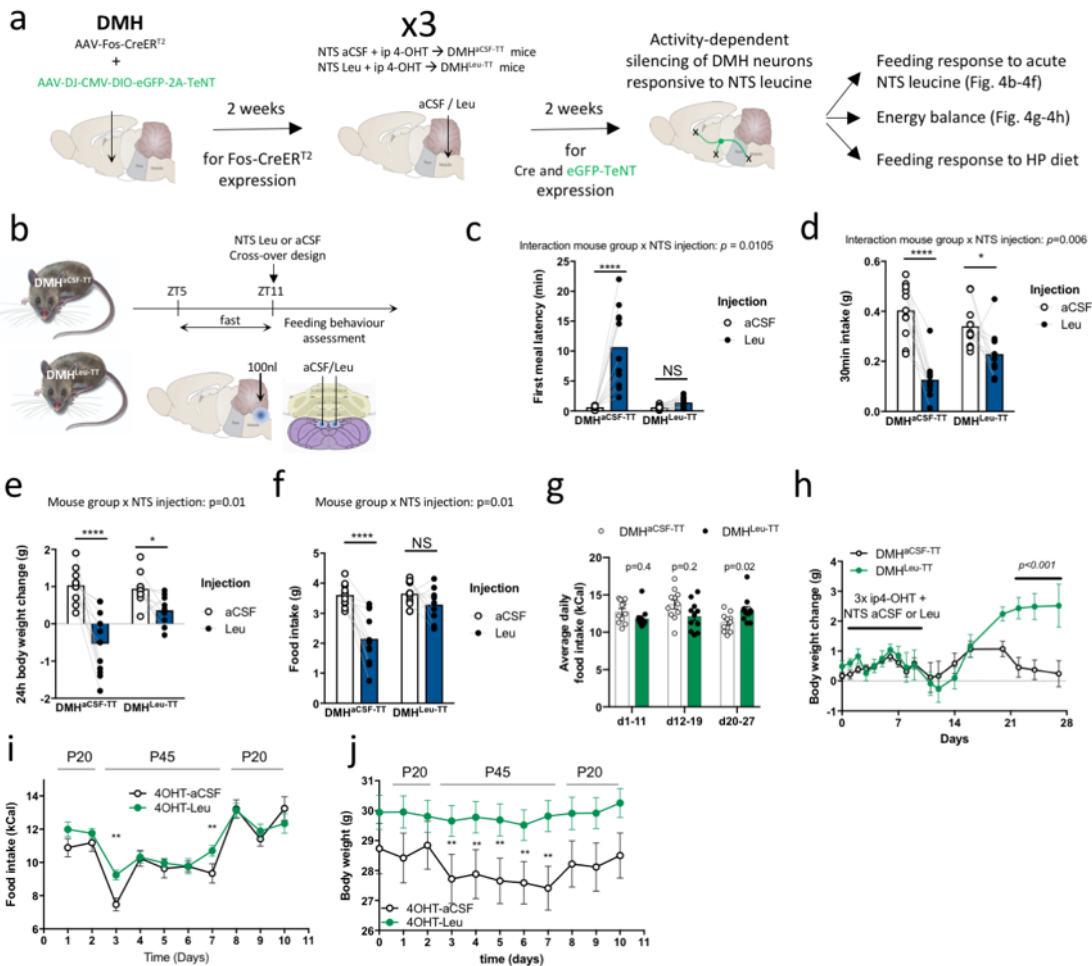

326  
 327 **Figure 4 DMH neurons responsive to NTS leucine sensing are necessary for the anorectic effect of NTS leucine and high**  
 328 **protein diets.** Diagram of the experimental paradigm to selectively silence DMH neurons receiving inputs from NTS leucine-  
 329 sensing neurons (a, DMH<sup>aCSF-TT</sup> and DMH<sup>Leu-TT</sup> mice). Diagram of the experimental paradigm used to test the feeding effect of  
 330 NTS leucine in DMH<sup>aCSF-TT</sup> and DMH<sup>Leu-TT</sup> mice (b). First meal latency (c), first meal size (d) 24h body weight change (e) and 24h  
 331 food intake (f) in DMH<sup>aCSF-TT</sup> and DMH<sup>Leu-TT</sup> mice following an acute injection of aCSF or leucine into the NTS. Average food intake  
 332 (g) and weight change (h) of in DMH<sup>aCSF-TT</sup> and DMH<sup>Leu-TT</sup> mice during the 4 weeks following DMH injection with the Tet-Tox  
 333 virus. Average food intake (i) and body weight (j) in DMH<sup>aCSF-TT</sup> and DMH<sup>Leu-TT</sup> mice during transitions from diets containing 20%  
 334 or 45 % of energy as proteins. All results are shown as means  $\pm$  SEM. \*:  $p < 0.05$ , \*\*:  $p < 0.01$ , \*\*\*:  $p < 0.001$  and \*\*\*\*:  $p < 0.0001$  vs.  
 335 aCSF or control group.

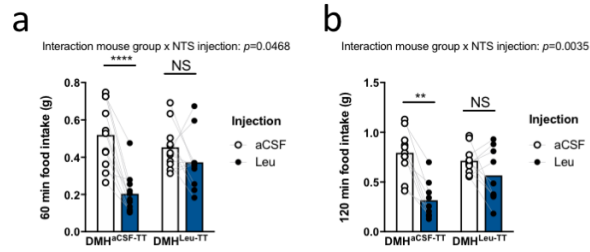

336

337

338

**Supp. Fig. 4:** 60min (a) and 120 min (b) food intake in DMH<sup>aCSF-TT</sup> and DMH<sup>Leu-TT</sup> mice following an acute injection of aCSF or leucine into the NTS.



## 339 Discussion

340 Our findings reveal a mechanism through which nutrient sensing in the NTS regulates food-  
341 seeking behavior, satiety and long-term energy balance via polysynaptic inhibition of AgRP neurons. We  
342 demonstrate that PrRP<sup>NTS</sup> neurons engage this circuit in response to the detection of the branched-chain  
343 amino acid leucine, a signal of dietary protein availability. Silencing of DMH neurons responsive to NTS  
344 leucine sensing blunts leucine's appetite-suppressive effects and dampens the anorexic and weight loss  
345 responses to a high protein diet, hence extending the role of this circuits in the behavioral and metabolic  
346 responses to dietary proteins.

347 Our data expand the characterization of the functional diversity of NTS TH neurons to include a  
348 subset of neurons expressing PrRP and CTR, projecting to the DMH and modulating feeding initiation and  
349 satiety via downstream projections to AgRP neurons. While other neuronal populations (including NTS  
350 and PVH neurons) activated by NTS leucine are likely involved in other behavioral, metabolic and  
351 neuroendocrine outputs of NTS leucine sensing, the circuit described here is sufficient to entirely explain  
352 the appetitive consequences of NTS leucine detection. These results provide support for a model in which  
353 specialized neuronal populations regulate specific behavioral outputs. Intriguingly, although PrRP and CTR  
354 neurons of the NTS have been shown to project to the PBN (Blouet et al., 2009; Dodd & Luckman, 2014),  
355 this site is not activated by NTS leucine, suggesting further functional diversity among these neurons.

356 Recent work indicates that AgRP neurons integrate various sensory inputs including  
357 environmental food-related cues and visceral mechanosensory and nutritional inputs (Bai et al., 2019;  
358 Betley et al., 2015; Beutler et al., 2017; Mandelblat-Cerf et al., 2015). Our work extends the integrative  
359 capability of AgRP neurons to include brainstem nutrient sensing inputs. Given that visceral vagal  
360 afferents terminate in the caudomedial NTS where PrRP/CTR neurons are concentrated, it is likely that  
361 intestinal sensory inputs engage the same circuit as NTS leucine to inhibit AgRP neurons. Thus, PrRP  
362 <sup>NTS</sup>→ LepR<sup>DMH</sup> circuit may be specialized in integrating nutritional cues arising from multiple central and  
363 peripheral interoceptors. These sites may be only partially functionally redundant, given the indication  
364 that caloric density is the primary information carried by vagal afferents activated by nutrients in the gut  
365 (Williams et al., 2016), whereas NTS nutrient sensing surveys nutritional status and post-absorptive  
366 nutrient availability. With the ability to monitor the availability of specific nutrients and relay this  
367 information to forebrain centers mediating the long-term control of energy balance, PrRP<sup>NTS</sup> neurons  
368 and their projections to LepR<sup>DMH</sup> neurons are well positioned to contribute to the production of  
369 nutrient-specific satiety, a well-established behavioral lacking mechanistic characterization (Johnson &  
370 Vickers, 1992).

371           DMH<sup>LepR</sup> neurons also process environmental food-related cues in the regulation of AgRP  
372 activity, and these may be integrated with former signals as well (Garfield et al., 2016). To our  
373 knowledge, these are the only inhibitory inputs to AgRP neurons identified so far. However polysynaptic  
374 retrograde tracing from AgRP neurons here revealed additional medullary inputs to AgRP neurons which  
375 may extend the inhibitory control of this population. Collectively, this work resolves the mechanisms  
376 through which NTS nutrient sensing modulate food-seeking behavior and provides insights into the  
377 functional organization feeding-regulatory circuits, creating new opportunity for the treatment of  
378 hyperphagic obesity and related metabolic disorders.  
379

## 380 **Material and Methods**

381

### 382 **Experimental models**

383 All experiments were performed on male mice in accordance with the Animals (Scientific Procedures) Act  
384 1986 and approved by the local animal ethic committees. Mice were obtained from Charles River UK (8-  
385 wk old C57/bl6J) or the Jackson Laboratories (*AgRP-ires-cre*, *Th-cre*, *NPY-hrGFP*), housed in individually  
386 ventilated cages with standard bedding and enrichment, maintained in a humidity-controlled room at 22-  
387 24°C on a 12 hr light/dark cycle with ad libitum access to water and standard laboratory chow diet unless  
388 otherwise stated. Isocaloric modified diets with varying protein amounts were custom made by Research  
389 Diets as per the formulations in Suppl. Table 1. For all experiments using cre reporter lines, we carried the  
390 work in hemizygous males or wild-type littermates randomly assigned to experimental groups. For studies  
391 performed on wild type mice, weight-matched groups were compared. Before each dietary change, mice  
392 were briefly exposed to the new diets to avoid neophobia or other novelty-related response in subsequent  
393 experiments.

394

### 395 **Methods details**

#### 396 Stereotaxic surgical procedures

397 Surgical procedures were performed on mice aged 9 to 11-wk old, under isoflurane anesthesia. All  
398 animals received Metacam prior to the surgery, 24 hr after surgery and were allowed a 1-week recovery  
399 period during which they were acclimatized to injection procedures. Mice were stereotactically implanted  
400 with bilateral steel guide cannulae (Plastics One) positioned 1 mm above the ARH (A/P: -1.1 mm, D/V:  
401 -4.9 mm, lateral: +/- 0.4 mm from Bregma) or the DMH (A/P: -1.5 mm, D/V: -4 mm, lateral: +/- 0.4 mm  
402 from Bregma), or 2mm above the caudomedial NTS (cannula holding bar in a 10° rostral-caudal angle,  
403 coordinates relative to occipital suture: A/P +0.5 mm, D/V -3 mm, lateral: +/- 0.4 to midline). Beveled  
404 stainless steel injectors (33 gauge) extending 1 mm (for ARH and DMH) and 2mm (for NTS) from the tip of  
405 the guide were used for injections. For chronic cannulae implantation, cannula guide was secured in place  
406 with Loctite glue and dental cement (Fujicem2). Correct targeting was confirmed histologically  
407 postmortem. Mice were allowed 1-wk recovery during which they were handled daily and acclimatized to  
408 relevant experimental settings.

#### 409 Viral vectors and injection procedures

410 For cre-dependent retrograde polysynaptic tracing, we used PRV-introvert, a newly developed version of  
411 PRV-Bartha in which retrograde viral propagation and reporter expression are activated only after

412 exposure to cre recombinase with high specificity (Pomeranz et al., 2017), kindly provided by Prof. Jeff  
413 Friedman (Rockefeller University). PRV-introvert was prepared as previously described (Pomeranz et al.,  
414 2017). Virus stocks were grown and tittered in PK15 cells ( $7.89 \times 10^8$  pfu/ml) (ATCC). Viral specificity was  
415 tested in vitro in HEK cells transfected with cre and by stereotaxic injection into the ARH of wild-type (n  
416 = 5). A total of 25 mice were used to characterize polysynaptic inputs to AgRP neurons. All received  
417 100nl of PRV-Introvert into the ARH and were sacrificed at 0, 24, 48, 72 or 96h) after the injection. These  
418 mice rapidly developed symptoms, were closely monitored, provided with hydrogel, mash and a heating  
419 pad throughout the postsurgical period, and were killed before reaching 20% of pre-surgical weight loss.  
420 Retrograde cre-dependent monosynaptic tracing was performed using AAV8-hSyn-FLEX-TVA-P2A-eGFP-  
421 2A-oG ( $2.82 \times 10^{12}$  vg/ml, 500nl per side) and the modified rabies strain SADΔG-mCherry(EnvA) ( $1.1 \times 10^9$   
422 TU/ml, 100nl bilaterally into the ARH 3 weeks later)(Callaway & Luo, 2015; E. J. Kim et al., 2016) both  
423 obtained from the Salk Institute Viral Vector Core. A total of 23 mice were used and perfused at different  
424 survival times after the rabies injection and up to 2 weeks later.

425 Activity dependent cell labelling and anterograde tracing were performed using the viral construct  
426 AAV8-fos-Cre-ERT2-PEST (AAV-fos-CreER,  $8.8 \times 10^{12}$  vg/ml, 300nl per side bilaterally, donated by Prof  
427 Deisseroth via the Stanford Virus Core) was combined with AAV8-EF1a-DIO-hChR2(H134R)-mCherry  
428 (AAV-DIO-ChR2:mCherry,  $1.9 \times 10^{13}$  vg/ml, 300nl per side, Addgene) or AAV-DJ-CMV-DIO-eGFP-2A-TeNT  
429 (AAV-DIO-TeNT,  $5.13 \times 10^{12}$  vg/ml, 300nl per side, Stanford University Neuroscience Gene Vector and  
430 Virus Core).

#### 431 NTS Leucine injection and acute food intake assessments

432 Studies were conducted in a home-cage environment. For NTS leucine injection, mice were food deprived  
433 for the 6 hr during the day before receiving a bilateral parenchymal injection of L-leucine (Sigma, 2.1 mM,  
434 50 nl/side, 50 nl/min) or aCSF (R and D) and were either immediately returned to their home cage for food  
435 intake analysis or perfused 80/90 min later for histological assessments. For food intake studies, the  
436 injection occurred 1h before dark-onset. Mice were refed after the injection and food intake was  
437 monitored over various time points after the refeeding. For the meal initiation experiment, digital cameras  
438 were used to record the first 30 min feeding respond after the mice received the brain injection and  
439 provided with a food pellet. All studies were performed in a crossover randomized manner on age- and  
440 weight-matched groups, and at least 4 days elapsed between each brain injection.

#### 441 Activity-dependent induction of cre expression

442 Mice that received AAV-fos-CreER into the NTS or the DMH and were chronically equipped with a cannula  
443 guide targeting the NTS went through a series of induction sessions as follows. Mice received an injection

444 of leucine into the NTS in their home cage as above and 80 minutes later were dosed with the tamoxifen  
445 metabolite 4-hydroxytamoxifen (4-PHT, Sigma, 40mg/kg ip) prepared using a formulation described  
446 previously (Ye et al., 2016). Mice remained fasted for 4hrs after the 4-HT injection. Each induction sessions  
447 were separated by a minimum of 96 hr.

#### 448 Brain perfusion, immunohistochemistry, microscopy and image analysis

449 Animals were anaesthetized with Dolethal (Vetoquinol UK Ltd) at 1 ml/kg in saline and transcardiacally  
450 perfused with 0.1M heparinized PBS followed by 4% paraformaldehyde. Brains were extracted and post-  
451 fixed in 4% paraformaldehyde, 30% sucrose for 48 hr at 4°C. Brains were sectioned using a Leica freezing  
452 sliding microtome into 5 subsets of 25 microns sections. Antigen retrieval was used for all experiments  
453 prior to antibody incubation. Sections were incubated in 10 mM sodium citrate at 80°C for 20 min then  
454 washed three times in PBS. Tissue was blocked for 1 hr with 5% normal donkey serum or 5% normal goat  
455 serum (Abcam) at room temperature, and incubated at 4°C with primary antibodies against c-fos (1:2000,  
456 Synaptic Systems), dsRed (1:1000, Clontech), GFP (1:1000, Abcam), TH (1:200, Immunostar), PrRP (1:1000,  
457 Abcam), Ha (1:1000, Cell Signaling Technology) and GFRAL (1:200, Thermo Fisher Scientific). Sections were  
458 then mounted on slides and coverslipped with Prolong Diamond (Thermo Fisher Scientific).

459 Sections were imaged using a Zeiss Axio slide scanner with 20x objective or Leica SP8 confocal microscope  
460 with the 40x or 63x objectives. Imaging settings remained the same between experimental and control  
461 conditions.

462 Images of tissue sections were digitized, and areas of interest were outlined based on cellular morphology  
463 and using the brain atlas of Paxinos and Franklin (Paxinos & Franklin, 2001). Images were analyzed using  
464 the ImageJ manual cell counter or Zeiss ZEN 2.3 software. For the analysis of projection coverage to the  
465 ARH, Imaris software (Oxford Instruments plc) was used to 3D reconstruct the ARH images stacks acquired  
466 by SP8 microscope and analyze the contact areas.

#### 467 Multiplexed FISH with RNAscope

468 Mice were perfused as described above. Brains were postfixed in 4% PFA solution overnight then  
469 cryoprotected in 30% sucrose solution in PBS for up to 24 h. Tissue was covered with optimal cutting  
470 temperature (OCT) media then sliced at 16 µm thickness using a Leica CM1950 cryostat directly onto  
471 Superfrost Plus slides (ThermoScientific) in an RNase free environment. Slides were then stored at -80°C.  
472 Multiplexed fluorescence in situ RNA hybridization (FISH) was performed using RNAscope technology.  
473 After epitope retrieval and dehydration, sections on slides were processed for multiplexed FISH using the  
474 RNAscope LS Multiplex Assay (Advanced Cell Diagnostics). Samples were first permeabilized with heat in  
475 Bond Epitope Retrieval solution 2 (pH 9.0, Leica - AR9640) at 95°C for 2 min, incubated in protease reagent

476 (Advanced Cell Diagnostics) at 42°C for 10 min, and finally treated with hydrogen peroxide for 10 min to  
477 inactivate endogenous peroxidases and the protease reagent. Samples were then incubated in z-probe  
478 mixtures for 2 h at 42°C and washed 3 times. DNA amplification trees were built through incubations in  
479 AMP1 (preamplifier), AMP2 (background reducer), then AMP3 (amplifier) reagents (Leica) for 15-30 min  
480 each at 42°C. Between incubations, slides were washed with LS Rinse buffer (Leica). After, samples were  
481 incubated in channel-specific horseradish peroxidase (HRP) reagents for 15 min at 42°C, TSA fluorophores  
482 for 30 min and HRP blocking reagent for 15 min at 42°C. The following TSA labels were used to visualize z-  
483 probes: Cy3 (1:500), FITC (1:500), and Cy5 (1:500) fluorophores (Perkin Elmer).  
484 Brain sections were imaged using a spinning disk Operetta CLS (Perkin Elmer) in confocal mode using a  
485 sCMOS camera and a 40x automated-water dispensing objective. Sections were imaged with z stacks at  
486 intervals of 1 µm. ROIs included the PVH, DMH, NTS, AP and DMX. Gain and laser power settings remained  
487 the same between experimental and control conditions within each experiment. Harmony software  
488 (Perkin Elmer) was used to automatically quantify number of labelled RNA molecules (spots) per cell, and  
489 number of labelled cells among other metrics.

490

#### 491 **Statistical analysis**

492 All data, presented as means ± SEM, have been analyzed using GraphPad Prism 8. For all statistical tests,  
493 an  $\alpha$  risk of 5% was used to define statistical significance. Dietary and aCSF/Leucine treatments were  
494 allocated randomly in weight-matched groups. When possible, we performed within mice comparisons  
495 and treatment were delivered in a cross-over manner in weight-matched groups. All kinetics were  
496 analyzed using repeated-measures two-way ANOVAs and adjusted with Bonferroni's post hoc tests.  
497 Multiple comparisons were tested with one-way ANOVAs and adjusted with Tukey's post hoc tests. Single  
498 comparisons were made using two-tail Student's t tests. We used blinding (to mouse genotype, viral  
499 treatment or drug delivered) for in vivo experiments and to perform image analysis. Additional statistical  
500 details for each experiment can be found on the figures on in the figure legend.

501

502 **Supp. Movie 1:** Video recording of a DMH<sup>leu-TT</sup> mouse following NTS aCSF administration and food  
 503 presentation (paradigm shown on Fig.1a).

504  
 505 **Supp. Movie 2:** Video recording of a DMH<sup>leu-TT</sup> mouse following NTS Leu administration and food  
 506 presentation (paradigm shown on Fig.1a).

507  
 508 **Supplemental Table 1:** Modified diets composition  
 509

| Ingredient                        | P20    |       | P45    |        |
|-----------------------------------|--------|-------|--------|--------|
|                                   | gm     |       | gm     |        |
| Casein                            | 233    |       | 510    |        |
| L-Cystine                         | 3.49   |       | 7.65   |        |
| Corn Starch                       | 326.6  |       | 156.5  |        |
| Maltodextrin 10                   | 150    |       | 75     |        |
| Sucrose                           | 107.1  |       | 107.1  |        |
| Cellulose                         | 50     |       | 50     |        |
| Soybean Oil                       | 88.9   |       | 88.9   |        |
| tBHQ                              | 0.014  |       | 0.014  |        |
| Mineral Mix S10022G               | 0      |       | 0      |        |
| Mineral Mix S10022C               | 3.5    |       | 3.5    |        |
| Calcium Carbonate                 | 10     |       | 12.35  |        |
| Calcium Phosphate, Dibasic        | 3.4    |       | 0      |        |
| Potassium Citrate, 1 H2O          | 3      |       | 8      |        |
| Potassium Phosphate,<br>Monobasic | 6.31   |       | 0      |        |
| Sodium Chloride                   | 2.59   |       | 2.59   |        |
| Vitamin Mix V10037                | 10     |       | 10     |        |
| Choline Bitartrate                | 2.5    |       | 2.5    |        |
| FD&C Yellow Dye #5                | 0      |       | 0      |        |
| FD&C Red Dye #40                  | 0.05   |       | 0      |        |
| FD&C Blue Dye #1                  | 0      |       | 0.05   |        |
| Total                             | 1000.4 |       | 1034.1 |        |
|                                   | gm     | kcal  | gm     | kcal   |
| Protein                           | 206    | 824.8 | 451    | 1805.4 |
| Carbohydrate                      | 594    | 2375  | 349    | 1394   |
| Fat                               | 89     | 800.2 | 89     | 800.2  |
| Fiber                             | 50     | 0     | 50     | 0      |
| Total                             | 939    | 4000  | 939    | 4000   |
|                                   | gm%    | kcal% | gm%    | kcal%  |
| Protein                           | 21     | 21    | 44     | 45     |
| Carbohydrate                      | 59     | 59    | 34     | 35     |
| Fat                               | 9      | 20    | 9      | 20     |

510

511 Acknowledgments: We thank B. Roth and K. Deisseroth for AAV plasmid constructs, E. Callaway for  
512 rabies tracing tools, and J. Friedman for sharing pseudorabies virus introvert. We thank Gregory  
513 Strachan at the Wellcome Trust-MRC Institute of Metabolic Science for his assistance with image  
514 analysis, and Julia Jones and Heather Zecchini at the Cancer Research UK Cambridge Institute for their  
515 assistance with RNAscope staining and imaging. This work was supported by the Medical Research  
516 Council (MR/N003276/1), the Medical Research Council Metabolic Disease Unit, and the Wellcome  
517 Trust Strategic Award for the MRL Disease Model Core and Imaging facilities  
518 (MRC\_MC\_UU\_12012/5 and 100574/Z/12/Z).

519

520 Author Contributions: AHT performed experiments, data analysis and drafted the manuscript. DN  
521 performed experiments, data analysis. TD and HS performed experiments. CB designed and performed  
522 experiments, data analysis and prepared the manuscript.

523

524 Competing Interests: The authors declare no competing interests.

525

526 Materials and correspondence: Correspondence and material requests should be addressed to  
527 Clemence Blouet.

528

529



## 530 References

- 531 1. Aklan, I., Sayar Atasoy, N., Yavuz, Y., Ates, T., Coban, I., Koksalar, F., Filiz, G., Topcu, I. C., Oncul, M.,  
532 Dilsiz, P., Cebecioglu, U., Alp, M. I., Yilmaz, B., Davis, D. R., Hajdukiewicz, K., Saito, K., Konopka,  
533 W., Cui, H., & Atasoy, D. (2020). NTS Catecholamine Neurons Mediate Hypoglycemic Hunger via  
534 Medial Hypothalamic Feeding Pathways. *Cell Metab*, 31(2), 313-326.e315.  
535 doi:10.1016/j.cmet.2019.11.016
- 536 2. Atasoy, D., Betley, J. N., Su, H. H., & Sternson, S. M. (2012). Deconstruction of a neural circuit for  
537 hunger *Nature* (Vol. 488, pp. 172-177). England.
- 538 3. Bai, L., Mesgarzadeh, S., Ramesh, K. S., Huey, E. L., Liu, Y., Gray, L. A., Aitken, T. J., Chen, Y., Beutler, L.  
539 R., Ahn, J. S., Madisen, L., Zeng, H., Krasnow, M. A., & Knight, Z. A. (2019). Genetic Identification  
540 of Vagal Sensory Neurons That Control Feeding. *Cell*, 179(5), 1129-1143.e1123.  
541 doi:10.1016/j.cell.2019.10.031
- 542 4. Betley, J. N., Xu, S., Cao, Z. F. H., Gong, R., Magnus, C. J., Yu, Y., & Sternson, S. M. (2015). Neurons for  
543 hunger and thirst transmit a negative-valence teaching signal. *Nature*, 521(7551), 180-185.  
544 doi:10.1038/nature14416
- 545 5. Beutler, L. R., Chen, Y., Ahn, J. S., Lin, Y. C., Essner, R. A., & Knight, Z. A. (2017). Dynamics of Gut-Brain  
546 Communication Underlying Hunger. *Neuron*, 96(2), 461-475.e465.  
547 doi:10.1016/j.neuron.2017.09.043
- 548 6. Bhavsar, S., Watkins, J., & Young, A. (1998). Synergy between amylin and cholecystokinin for inhibition  
549 of food intake in mice. *Physiol Behav*, 64(4), 557-561. doi:10.1016/s0031-9384(98)00110-3
- 550 7. Blevins, J. E., Morton, G. J., Williams, D. L., Caldwell, D. W., Bastian, L. S., Wisse, B. E., Schwartz, M. W.,  
551 & Baskin, D. G. (2009). Forebrain melanocortin signaling enhances the hindbrain satiety  
552 response to CCK-8. *Am J Physiol Regul Integr Comp Physiol*, 296(3), R476-484. Epub 2008 Dec  
553 2024.
- 554 8. Blouet, C., Jo, Y. H., Li, X., & Schwartz, G. J. (2009). Mediobasal hypothalamic leucine sensing regulates  
555 food intake through activation of a hypothalamus-brainstem circuit. *J Neurosci*, 29(26), 8302-  
556 8311.
- 557 9. Blouet, C., & Schwartz, G. J. (2010). Hypothalamic nutrient sensing in the control of energy  
558 homeostasis. *Behav Brain Res*, 209(1), 1-12.
- 559 10. Blouet, C., & Schwartz, G. J. (2012). Brainstem nutrient sensing in the nucleus of the solitary tract  
560 inhibits feeding. *Cell Metab*, 16(5), 579-587.
- 561 11. Callaway, E. M., & Luo, L. (2015). Monosynaptic Circuit Tracing with Glycoprotein-Deleted Rabies  
562 Viruses. *J Neurosci*, 35(24), 8979-8985. doi:10.1523/jneurosci.0409-15.2015
- 563 12. Cavanaugh, A. R., Schwartz, G. J., & Blouet, C. (2015). High-fat feeding impairs nutrient sensing and  
564 gut brain integration in the caudomedial nucleus of the solitary tract in mice. *PLoS One*, 10(3),  
565 e0118888. doi:10.1371/journal.pone.0118888
- 566 13. Cheng, W., Gonzalez, I., Pan, W., Tsang, A. H., Adams, J., Ndoka, E., Gordian, D., Khoury, B., Roelofs,  
567 K., Evers, S. S., MacKinnon, A., Wu, S., Frikke-Schmidt, H., Flak, J. N., Trevaskis, J. L., Rhodes, C. J.,  
568 Fukada, S. I., Seeley, R. J., Sandoval, D. A., Olson, D. P., Blouet, C., & Myers, M. G., Jr. (2020).  
569 Calcitonin Receptor Neurons in the Mouse Nucleus Tractus Solitarius Control Energy Balance via  
570 the Non-aversive Suppression of Feeding. *Cell Metab*, 31(2), 301-312.e305.  
571 doi:10.1016/j.cmet.2019.12.012
- 572 14. D'Agostino, G., Lyons, D. J., Cristiano, C., Burke, L. K., Madara, J. C., Campbell, J. N., Garcia, A. P.,  
573 Land, B. B., Lowell, B. B., Dileone, R. J., & Heisler, L. K. (2016). Appetite controlled by a  
574 cholecystokinin nucleus of the solitary tract to hypothalamus neurocircuit. *Elife*, 5.  
575 doi:10.7554/eLife.12225

- 576 15. Darcel, N. P., Liou, A. P., Tome, D., & Raybould, H. E. (2005). Activation of vagal afferents in the rat  
577 duodenum by protein digests requires PepT1. *J Nutr*, *135*(6), 1491-1495.  
578 doi:10.1093/jn/135.6.1491
- 579 16. Dodd, G. T., & Luckman, S. M. (2014). Physiological Roles of GPR10 and PrRP Signaling. *Front*  
580 *Endocrinol (Lausanne)*, *4*, 20. doi:10.3389/fendo.2013.00020  
581 10.3389/fendo.2013.00020
- 582 17. Fenselau, H., Campbell, J. N., Verstegen, A. M., Madara, J. C., Xu, J., Shah, B. P., Resch, J. M., Yang, Z.,  
583 Mandelblat-Cerf, Y., Livneh, Y., & Lowell, B. B. (2017). A rapidly acting glutamatergic ARC-->PVH  
584 satiety circuit postsynaptically regulated by alpha-MSH. *Nat Neurosci*, *20*(1), 42-51.  
585 doi:10.1038/nn.4442
- 586 18. Garfield, A. S., Shah, B. P., Burgess, C. R., Li, M. M., Li, C., Steger, J. S., Madara, J. C., Campbell, J. N.,  
587 Kroeger, D., Scammell, T. E., Tannous, B. A., Myers, M. G., Jr., Andermann, M. L., Krashes, M. J.,  
588 & Lowell, B. B. (2016). Dynamic GABAergic afferent modulation of AgRP neurons. *Nat Neurosci*,  
589 *19*(12), 1628-1635. doi:10.1038/nn.4392
- 590 19. Gaykema, R. P., Newmyer, B. A., Ottolini, M., Raje, V., Warthen, D. M., Lambeth, P. S., Niccum, M.,  
591 Yao, T., Huang, Y., Schulman, I. G., Harris, T. E., Patel, M. K., Williams, K. W., & Scott, M. M.  
592 (2017). Activation of murine pre-proglucagon-producing neurons reduces food intake and body  
593 weight. *J Clin Invest*, *127*(3), 1031-1045. doi:10.1172/jci81335
- 594 20. Grill, H. J., & Hayes, M. R. (2009). The nucleus tractus solitarius: a portal for visceral afferent signal  
595 processing, energy status assessment and integration of their combined effects on food intake.  
596 *Int J Obes*, *33*(Suppl 1), S11-15.
- 597 21. Hahn, T. M., Breininger, J. F., Baskin, D. G., & Schwartz, M. W. (1998). Coexpression of AgRP and NPY  
598 in fasting-activated hypothalamic neurons. *Nat Neurosci*, *1*(4), 271-272. doi:10.1038/1082
- 599 22. Hayes, M. R., Lechner, T. M., Zhao, S., Lee, G. S., Chowansky, A., Zimmer, D., De Jonghe, B. C.,  
600 Kanoski, S. E., Grill, H. J., & Bence, K. K. (2011). Intracellular signals mediating the food intake-  
601 suppressive effects of hindbrain glucagon-like peptide-1 receptor activation. *Cell Metab*, *13*(3),  
602 320-330.
- 603 23. Holt, M. K., Pomeranz, L. E., Beier, K. T., Reimann, F., Gribble, F. M., & Rinaman, L. (2019). Synaptic  
604 Inputs to the Mouse Dorsal Vagal Complex and Its Resident Preproglucagon Neurons. *J Neurosci*,  
605 *39*(49), 9767-9781. doi:10.1523/jneurosci.2145-19.2019
- 606 24. Johnson, J., & Vickers, Z. (1992). Factors influencing sensory-specific satiety. *Appetite*, *19*(1), 15-31.  
607 doi:10.1016/0195-6663(92)90233-v
- 608 25. Kim, D.-Y., Heo, G., Kim, M., Kim, H., Jin, J. A., Kim, H.-K., Jung, S., An, M., Ahn, B. H., Park, J. H., Park,  
609 H.-E., Lee, M., Lee, J. W., Schwartz, G. J., & Kim, S.-Y. (2020). A neural circuit mechanism for  
610 mechanosensory feedback control of ingestion. *Nature*. doi:10.1038/s41586-020-2167-2
- 611 26. Kim, E. J., Jacobs, M. W., Ito-Cole, T., & Callaway, E. M. (2016). Improved Monosynaptic Neural  
612 Circuit Tracing Using Engineered Rabies Virus Glycoproteins. *Cell Rep*, *15*(4), 692-699.  
613 doi:10.1016/j.celrep.2016.03.067
- 614 27. Krashes, M. J., Shah, B. P., Madara, J. C., Olson, D. P., Strohlic, D. E., Garfield, A. S., Vong, L., Pei, H.,  
615 Watabe-Uchida, M., Uchida, N., Liberles, S. D., & Lowell, B. B. (2014). An excitatory  
616 paraventricular nucleus to AgRP neuron circuit that drives hunger. *Nature*, *507*(7491), 238-242.  
617 doi:10.1038/nature12956
- 618 28. Kreisler, A. D., Davis, E. A., & Rinaman, L. (2014). Differential activation of chemically identified  
619 neurons in the caudal nucleus of the solitary tract in non-entrained rats after intake of satiating  
620 vs. non-satiating meals. *Physiol Behav*, *136*, 47-54. doi:10.1016/j.physbeh.2014.01.015
- 621 29. Lawrence, C. B., Ellacott, K. L., & Luckman, S. M. (2002). PRL-releasing peptide reduces food intake  
622 and may mediate satiety signaling. *Endocrinology*, *143*(2), 360-367.  
623 doi:10.1210/endo.143.2.8609

- 624 30. Mandelblat-Cerf, Y., Ramesh, R. N., Burgess, C. R., Patella, P., Yang, Z., Lowell, B. B., & Andermann,  
625 M. L. (2015). Arcuate hypothalamic AgRP and putative POMC neurons show opposite changes in  
626 spiking across multiple timescales. *Elife*, 4. doi:10.7554/eLife.07122
- 627 31. Palmiter, R. D. (2018). The Parabrachial Nucleus: CGRP Neurons Function as a General Alarm. *Trends*  
628 *Neurosci*, 41(5), 280-293.
- 629 32. Patel, S., Alvarez-Guaita, A., Melvin, A., Rimmington, D., Dattilo, A., Miedzybrodzka, E. L., Cimino, I.,  
630 Maurin, A. C., Roberts, G. P., Meek, C. L., Virtue, S., Sparks, L. M., Parsons, S. A., Redman, L. M.,  
631 Bray, G. A., Liou, A. P., Woods, R. M., Parry, S. A., Jeppesen, P. B., Kolnes, A. J., Harding, H. P.,  
632 Ron, D., Vidal-Puig, A., Reimann, F., Gribble, F. M., Hulston, C. J., Farooqi, I. S., Fafournoux, P.,  
633 Smith, S. R., Jensen, J., Breen, D., Wu, Z., Zhang, B. B., Coll, A. P., Savage, D. B., & O'Rahilly, S.  
634 (2019). GDF15 Provides an Endocrine Signal of Nutritional Stress in Mice and Humans. *Cell*  
635 *Metab*. doi:10.1016/j.cmet.2018.12.016
- 636 33. Paxinos, G., & Franklin, K. B. J. (2001). The Mouse Brain in Stereotaxic Coordinates, Second edition.  
637 *Academic Press, NY*.
- 638 34. Petrov, T., Krukoff, T. L., & Jhamandas, J. H. (1993). Branching projections of catecholaminergic  
639 brainstem neurons to the paraventricular hypothalamic nucleus and the central nucleus of the  
640 amygdala in the rat *Brain Res* (Vol. 609, pp. 81-92). Netherlands.
- 641 35. Pickard, G. E., Smeraski, C. A., Tomlinson, C. C., Banfield, B. W., Kaufman, J., Wilcox, C. L., Enquist, L.  
642 W., & Sollars, P. J. (2002). Intravitreal injection of the attenuated pseudorabies virus PRV Bartha  
643 results in infection of the hamster suprachiasmatic nucleus only by retrograde transsynaptic  
644 transport via autonomic circuits. *J Neurosci*, 22(7), 2701-2710. doi:10.1523/jneurosci.22-07-  
645 02701.2002
- 646 36. Pomeranz, L. E., Ekstrand, M. I., Latcha, K. N., Smith, G. A., Enquist, L. W., & Friedman, J. M. (2017).  
647 Gene Expression Profiling with Cre-Conditional Pseudorabies Virus Reveals a Subset of Midbrain  
648 Neurons That Participate in Reward Circuitry. *J Neurosci*, 37(15), 4128-4144.  
649 doi:10.1523/jneurosci.3193-16.2017
- 650 37. Rinaman, L. (2010). Hindbrain noradrenergic A2 neurons: diverse roles in autonomic, endocrine,  
651 cognitive, and behavioral functions. *Am J Physiol*, 300(2), R222-235.
- 652 38. Roman, C. W., Derkach, V. A., & Palmiter, R. D. (2016). Genetically and functionally defined NTS to  
653 PBN brain circuits mediating anorexia. *Nat Commun*, 7, 11905. doi:10.1038/ncomms11905
- 654 39. Roman, C. W., Sloat, S. R., & Palmiter, R. D. (2017). A tale of two circuits: CCK(NTS) neuron  
655 stimulation controls appetite and induces opposing motivational states by projections to distinct  
656 brain regions. *Neuroscience*, 358, 316-324. doi:10.1016/j.neuroscience.2017.06.049
- 657 40. Su, Z., Alhadeff, A. L., & Betley, J. N. (2017). Nutritive, Post-ingestive Signals Are the Primary  
658 Regulators of AgRP Neuron Activity. *Cell Rep*, 21(10), 2724-2736.  
659 doi:10.1016/j.celrep.2017.11.036
- 660 41. Swerdlow, N. R., van der Kooy, D., Koob, G. F., & Wenger, J. R. (1983). Cholecystokinin produces  
661 conditioned place-aversions, not place-preferences, in food-deprived rats: evidence against  
662 involvement in satiety. *Life Sci*, 32(18), 2087-2093. doi:10.1016/0024-3205(83)90096-6
- 663 42. Vu, J. P., Luong, L., Parsons, W. F., Oh, S., Sanford, D., Gabalski, A., Lighton, J. R., Pisegna, J. R., &  
664 Germano, P. M. (2017). Long-Term Intake of a High-Protein Diet Affects Body Phenotype,  
665 Metabolism, and Plasma Hormones in Mice. *J Nutr*, 147(12), 2243-2251.  
666 doi:10.3945/jn.117.257873
- 667 43. Williams, E. K., Chang, R. B., Storchlic, D. E., Umans, B. D., Lowell, B. B., & Liberles, S. D. (2016).  
668 Sensory Neurons that Detect Stretch and Nutrients in the Digestive System. *Cell*, 166(1), 209-  
669 221. doi:10.1016/j.cell.2016.05.011
- 670 44. Ye, L., Allen, W. E., Thompson, K. R., Tian, Q., Hsueh, B., Ramakrishnan, C., Wang, A. C., Jennings, J.  
671 H., Adhikari, A., Halpern, C. H., Witten, I. B., Barth, A. L., Luo, L., McNab, J. A., & Deisseroth, K.

672 (2016). Wiring and Molecular Features of Prefrontal Ensembles Representing Distinct  
673 Experiences. *Cell*, 165(7), 1776-1788. doi:10.1016/j.cell.2016.05.010  
674
